# Supplementary material for: Identification of Alkaloids and Repurposed Drugs as Potential Small-Molecule Inhibitors of GOLPH3 in Colorectal and Lung Cancer Using Molecular Docking, Molecular Dynamics, and MM-PBSA Analysis
Source: Research Square preprint supplement (doi:10.21203/rs.3.rs-7524490/v1), 2025-10-07
Supplement: Supplementary file 1 [file f8fbadd23a8dfa19322f9ed7.docx]

**Supplementary Table 1** Binding energies (ΔG) in Kcal/mol of the interactions of the 200 alkaloids with the GPP34 domain of GOLPH3 and their reported anticancer properties [1-3].

| **Ligands** | **CID** | **Binding Affinity** | **Anticancer properties** |
| --- | --- | --- | --- |
| 6-hydroxymanzamine A | 10393120 | -10.8 | In vitro cytotoxicity against L-1210 and KJ3 cells |
| Notoamide D | 16127841 | -10.5 | Weak cytotoxicity against HeLa and L-1210 cells |
| Bisleuconothine A | 46881778 | -10.5 | Cytostatic activity; due to the induction of autophagy by preventing the degradation of autophagosomes in A549 and MCF-7 cells. |
| Discorhabdin W | 135466418 | -10.4 | Potent cytotoxicity against P-388 cells |
| Madangamine F | 44421333 | -10.2 | Less potent cytotoxic activity against MDA-MB-435, HL-60, SF-234 and HCT-8 cell lines |
| Madangamine A | 9980274 | -10.2 | In vivo cytotoxic activity against murine leukemia P388 and human lung A549, brain U373, and breast MCF-7 cancer cell lines |
| Fumiquinazoline C | 11339719 | -10.1 | Cytotoxicity against FT210, A549, BEL-7402, HL60, and P388 cells |
| Biemnadin | 163156431 | -10.1 | In vitro cytotoxicity against human oral epidermoid carcinoma (KB) cells and murine lymphoma L-1210 cells |
| Cytoglobosin F | 46209921 | -10.1 | Cytotoxic activity against the A-549 tumor cell line |
| Dragmacidin D | 15000037 | -10 | Inhibits the growth of P388 and A549 tumor cell lines |
| Cytoglobosin G | 46209922 | -10 | Cytotoxic activity against the A-549 tumor cell line |
| Acyriaflavin A | 5327723 | -10 | Moderate cytotoxic activities against the K562 cell line |
| Cytoglobosin B | 71768062 | -9.9 | Cytotoxic activity against the A-549 tumor cell line |
| Notoamide B | 16127923 | -9.8 | Weak cytotoxicity against HeLa and L-1210 cells |
| Cytoglobosin A | 46209792 | -9.8 | Cytotoxic activity against the A-549 tumor cell line |
| Luteoalbusin B | 71497283 | -9.8 | Cytotoxic activity against SF-268, MCF-7, NCI-H460, and Hep G-2 cell lines |
| Shermilamine B | 9908435 | -9.8 |  |
| Amphimedine | 100819 | -9.7 | Cytotoxic activity |
| Notoamide A | 16128040 | -9.7 | Weak cytotoxicity against HeLa and L-1210 cells |
| Haliclonacyclamine F | 16215158 | -9.7 | Cytotoxic activity against MDA-MB-435, HL-60, SF-234 and HCT-8 cell lines |
| Fumiquinazoline G | 10247811 | -9.6 | Cytotoxicity against FT210, A549, BEL-7402, HL60, and P388 cells |
| Bengacarboline | 10741986 | -9.6 | Inhibit the catalytic activity of topoisomerase II |
| Cytoglobosin C | 44610809 | -9.6 | cytotoxic activity against the A-549 tumor cell line |
| Cytoglobosin D | 46209919 | -9.6 | Cytotoxic activity against the A-549 tumor cell line |
| Spiroindimicin D | 60166300 | -9.6 | Moderate cytotoxic activity against HepG2, B16, and H460 cell lines |
| Fumiquinazoline F | 10089772 | -9.5 | cytotoxicity against FT210, A549, BEL-7402, HL60, and P388 cell lines |
| Papuamine | 10248478 | -9.5 | inhibit cell proliferation in MCF-7 (breast), LNCap (prostate), Caco-2 (colon), and HCT-15 (colon) cells; accumulate lymphoma U937 cells at sub-G1 phase and induce condensation of chromatin and fragmentation of the nucleus |
| Mappianine B | 137347205 | -9.5 | MGC-803, Bel-7404, A549, NCI–H460, HepG2; induction of cytotoxicity |
| Cortistatin K | 16736905 | -9.5 | Less potent cytostatic antiproliferative activity against human umbilical vein endothelial cells (HUVEC) |
| Luteoalbusin A | 71497282 | -9.5 | Cytotoxic activity against SF-268, MCF-7, NCI-H460, and Hep G-2 cell lines |
| Fumiquinazoline A | 11247802 | -9.4 | cytotoxicity against FT210, A549, BEL-7402, HL60, and P388 cells |
| Wakayin | 9973710 | -9.4 | in vitro cytotoxicity against the human colon tumor cell line (HCT-116); inhibiting topoisomerase II enzyme by damaging the DNA |
| Haliclonadiamine | 10316977 | -9.3 | inhibits cell proliferation in human cancer cell lines; inducing condensation of chromatin and fragmentation of nucleus in accumulated lymphoma U937 cells at sub-G1 |
| Discorhabdin D | 135846979 | -9.2 | P-388; Induction of cytotoxicity |
| Discorhabdin L | 135451013 | -9.1 | HT-29, p-388; potent cytotoxic activity |
| Cortistatin J | 16737543 | -9.1 | Potent cytostatic antiproliferative activity against human umbilical vein endothelial cells (HUVEC); inhibits migration and tubular formation of HUVEC induced by VEGF |
| Topsentin B | 183528 | -9.1 | Antiproliferative activity against human bronchopulmonary cancer cells (NSCLC-N6) |
| Plakinamine G | 21592303 | -9.1 | C6 cells bioactivity |
| Notoamide C | 25163938 | -9.1 | Weak cytotoxicity against HeLa and L-1210 cells |
| Liriodenine | 10144 | -9 | A549, CAOV-3; antiproliferative effect, increases apoptosis, induction of G2/M arrest |
| Kuanoniamine A | 390989 | -9 | Cytotoxic activity against human lung cancer line and a mouse leukemia line |
| Nortopsentin B | 456387 | -9 | Cytotoxic activity against p388 cell line |
| Tetrahydroplakinamine A | 101194564 | -8.9 | Cytotoxicity against C6 cells |
| leucosolenamine A | 102471029 | -8.9 | C-38; Induction of cytotoxicity |
| Dragmacidin A | 11260315 | -8.9 | P388; inhibits the in vitro growth of the cell line |
| Cycleanine | 121313 | -8.9 | Ovcar-8 and A2780 (Ovarian cancer); increases apoptosis, activation of caspases 3/7, cleavage of poly (ADP-ribose) polymerase to form poly (ADP-ribose) polymerase-1 |
| Plakinidine E | 135513248 | -8.9 | cytotoxic activity against L-1210 murine leukemia cell lines |
| leucosolenamine A | 16104874 | -8.9 | C-38; Induction of cytotoxicity |
| Topsentin | 72457 | -8.9 | Antiproliferative activity against human bronchopulmonary cancer cells (NSCLC-N6) |
| Plakinidine D | 10589419 | -8.8 | cytotoxic activity toward L-1210 murine leukemia cell lines |
| Cortistatin L | 16736906 | -8.8 | Less potent cytostatic antiproliferative activity against human umbilical vein endothelial cells (HUVEC) |
| Deoxytopsentin | 183527 | -8.8 | Antiproliferative activity against human bronchopulmonary cancer cells (NSCLC-N6) |
| Brucine | 442021 | -8.8 | PC-9 (lung cancer); Antiproliferative effect, cell-cycle arrest at G0/G1, decreases cyclin D1, E |
| Zanthomuurolanine | 44567548 | -8.8 | Antineoplastic and apoptosis agonist |
| Nortopsentin C | 456386 | -8.8 | P388; in vitro cytotoxic activity |
| Spiroindimicin B | 60166298 | -8.8 | moderate cytotoxic activities against CCRF-CEM, B16, and H460 cell lines |
| Hernandezine | 72343 | -8.8 | A549, HepG2, Hep3B, H1299; Induction of autophagy, activation of AMPK and Atg7 |
| Makaluvamine F | 135407624 | -8.7 | in vitro cytotoxicity against the human colon tumor cell line HCT-116; inhibits catalytic activity of topoisomerase II |
| Jorunnamycin A | 16043476 | -8.7 | potent cytotoxicity against various cancer cell lines |
| Arenosclerin D | 16215036 | -8.7 | Cytotoxic activity against MDA-MB-435, HL-60, and HCT-8 cell lines |
| Deoxytubulosine | 165003 | -8.7 | Inhibits enzyme activity of the leukemic leucocyte in both CML and ALL, In Vitro |
| Chelidonine | 197810 | -8.7 | HepG2; Induction of G2/M arrest |
| 6-methoxyspirotryprostatin B | 24900164 | -8.7 | cytotoxic activity against A-549, HL-60 cell lines |
| 2-Bromoleptoclinidinone | 378074 | -8.7 | in vitro cytotoxicity against L 1210 murine leukemia, P388 |
| Spiroindimicin C | 60166299 | -8.7 | Cytotoxic activity against HepG2 and H460 cell lines |
| Hyrtioerectine A | 11589139 | -8.6 | moderate cytotoxic activity against HeLa cells. |
| Dercitin | 130774 | -8.6 | Cytotoxic activity against solid human lung cancer line and a mouse leukemia line |
| Neferine | 159654 | -8.6 | H520, H661, H441, A549; induces apoptosis, activation of MAPKs, loss of mitochondrial membrane |
| Nortopsentin A | 179268 | -8.6 | Cytotoxic activity against p388 cell lines |
| 18-oxotryprostatin A | 24900162 | -8.6 | weak cytotoxicity against A-549 cell line |
| Variolin B | 9817550 | -8.6 | In vitro cytotoxic activity against P-388 cell lines |
| Jorumycin | 9849761 | -8.6 | NIH 3T3 (Mouse embryo fibroblasts), A-549, HT-29, P-388 and MEL-28; induction of cytotoxicity |
| 6-Acetonyldihydroavicine | 101212618 | -8.5 | nil |
| Dihydroplakinamine K | 11260519 | -8.5 | Potent cytotoxicity against the human colon tumor cell line (HCT-116) |
| Plakinamine K | 11340943 | -8.5 | cytotoxic activity against the human colon tumor cell line (HCT-116) |
| Plakinamine H | 12049601 | -8.5 | cytotoxic activity against C6 cells and RAW-264 cell lines |
| Prianosin B | 135765004 | -8.5 | In vitro cytotoxic activity against murine lymphomas L-1210 and L-5178Y cells and human epidermoid carcinoma KB cell |
| Maharine | 36689305 | -8.5 | HL-60; apoptosis, loss of mitochondrial membrane potential, activation of caspase-9/caspase-3 |
| Pericalline | 6436240 | -8.5 | P-388 (mouse leukemia); Induction of cytotoxicity and topoisomerase inhibition |
| Fascaplysin | 73293 | -8.5 | HL-60; increases apoptosis, activates the PARP-1 cleavage, caspase, induction of autophagy |
| Tsitsikammamine A | 135503612 | -8.4 | cytotoxic activity against human colon tumor (HCT-116) cell line |
| Tetrahydrosecamine | 169527 | -8.4 | KB and P-388; Induction of cytotoxicity |
| Camptothecin | 24360 | -8.4 | Inhibits tumor cell proliferation and induces apoptosis by inhibiting topoisomerase 1 |
| Fangchinoline | 73481 | -8.4 | induces apoptosis and autophagy in T24 and 5637 bladder cancer cells |
| Oxymatrine | 114850 | -8.3 | NSCLC, A549; inhibits cell proliferation and induces apoptosis |
| Naamidine G | 135511073 | -8.3 | weak cytotoxicity against HeLa cell line |
| Tsitsikammamine B | 135524537 | -8.3 | weak cytotoxicity against A-549 cell line |
| Noscapine | 275196 | -8.3 | cytotoxicity against MCF-7 and MDA-MB-231 by inducing apoptosis |
| Scutebarbatine A | 45110781 | -8.3 | Cytotoxic activity against A549 by inducing concentration-dependent apoptosis associated with upregulation of the expressions of caspase-3, caspase-9, cytochrome c, and downregulation of Bcl-2 |
| Tetrahydrocoptisine | 6770 | -8.3 | HCT116, MCF-7; inhibit AKR1C3 |
| Gelliusine A | 157833 | -8.2 | cytotoxic activity against KB, P-388, P-388/dox, HT-29, and NSCLCN-6 cell lines |
| Jorunnamycin C | 16105213 | -8.2 | potent cytotoxicity against various cancer cell lines |
| 1',2',3',4'-Tetradehydrotubulosine | 21668793 | -8.2 | Weak cytotoxic activity against human oral epidermoid carcinoma (KB) cells |
| Sanpangine | 387195 | -8.2 | Cytotoxicity against HL-60 cell line |
| Sewarine | 5458504 | -8.2 | KB, P-388; Induction of cytotoxicity |
| Carboxymethyldihydrochelerythrine | 13946324 | -8.1 | Potency against A549, Hela, SMMC-7721, and EJ |
| Isomahanine (pyrayafoline D) | 375148 | -8.1 | cytotoxicity against HL-60 human leukemia cell line |
| Makaluvamine D | 457711 | -8.1 | t in vitro cytotoxicity against the human colon tumor cell line HCT-116 |
| Sanguinarium | 5154 | -8.1 | AsPC-1 & BxPC-3 (adenocarcinoma of the pancreas); Induction of cytotoxicity. A549; induces apoptosis, G1 cell cycle arrest |
| Coronaridine | 6426909 | -8.1 | P-388(mouse leukemia); Induction of cytotoxicity and topoisomerase inhibition |
| Purealin | 9576835 | -8.1 | Inhibitory activity on Na+, K+-ATPase |
| Jorunnamycin B | 102178163 | -8 | potent cytotoxicity against various cancer cell lines |
| Discorhabdin G | 135515105 | -8 | P-388; Induction of cytotoxicity |
| Eudistomin I | 145930 | -8 | nil |
| Aplicyanin B | 16718384 | -8 | Cytotoxic activity against A-549, HT-29, MDA-MB-231 |
| Zyzzyanone A | 21589284 | -8 | moderate cytotoxic activity against mouse Ehrlich carcinoma cells |
| Clivorine | 21606566 | -8 | L-02 (human fetal hepatocyte), Huh-7.5 (liver carcinoma cell); Induction of p38 mitogen-activated protein kinase phosphorylation, induces apoptosis, cleavage of the poly (ADP-ribose) polymerase |
| Heyneanine | 432336 | -8 | HeLa, Hep-2; induces apoptosis |
| Voacangine | 73255 | -8 | HeLa, Hep-2; induces apoptosis |
| Pretazettine | 73360 | -8 | inhibit the proliferation of L5178 mouse lymphoma cells and induce apoptosis in the sub-G1 phase |
| 9-Methoxycamptothecin | 123617 | -7.9 | Cytotoxic activity against HepG2, Hep3B, MDA- MB-231, MCF-7, A549, and Ca9-22 cell lines |
| Naamidine H | 135846070 | -7.9 | weak cytotoxicity against HeLa cells |
| Chelerythrine | 2703 | -7.9 | HEK-293, SW-839; induces apoptosis associated with inhibition of phosphorylation of ERK, Akt, upregulation of p53 and Bax as well as downregulation of Bcl-2, caspase-3 and PARP |
| Neocryptolepine | 390526 | -7.9 | P-388, HL-60(promyelocytic leukemia), HL-60/MX2; Induction of cytotoxicity, intercalation into DNA, apoptosis, cell-cycle arrest at G2/M |
| Trisphaeridine | 443684 | -7.9 | L5178 MDR (murine leukemia); antiproliferative effect, cell-cycle arrest at sub-G1 phase |
| Norchelerythrine | 443719 | -7.9 | Cytotoxic activity against p-388 |
| Agelastatin F | 46209659 | -7.9 | cytotoxic activity against the KB cell lines |
| Oxynitidine | 97597 | -7.9 | nil |
| Eudistomin H | 145929 | -7.8 | nil |
| Berberine | 2353 | -7.8 | DLD-2; reduces tumor formation by inhibiting COX-2 transcriptional activity |
| 14-hydroxyterezine D | 24900165 | -7.8 | A-549, HL-60; induction of cytotoxicity |
| Ellipticine | 3213 | -7.8 | MCF-7; antiproliferative activity, inhibit topoisomerase II, DNA intercalation |
| Arborescidine D | 378619 | -7.8 | In vitro cytotoxic activity against the growth of KB human buccal carcinoma cells |
| Antofine | 639288 | -7.8 | Inhibit the transcriptional activity of β-catenin/Tcf in HCT 116 human colon cancer cells with promotion of TNF-α-induced apoptosis |
| Makaluvamine E | 9973231 | -7.8 | in vivo antitumor activity against the human ovarian carcinoma ovcar-3 |
| Botrillazine B | 135410323 | -7.7 | cytotoxicity against A-549 and MEL-28 cell lines |
| Agelastatin A | 177936 | -7.7 | cytotoxic activity against the KB and L-1210 cell lines |
| Harmalol | 3565 | -7.7 | exhibit antitumor activities by inhibiting the DNA topoisomerases and interfering with DNA synthesis in lung, ovarian, and renal cancer cell lines |
| Gelastatin E | 46886846 | -7.7 | cytotoxic activity against the KB cell lines |
| Vallesiachotamine | 5384527 | -7.7 | KB , P-388; Induction of cytotoxicity |
| Cryptolepine | 82143 | -7.7 | P-388, HL-60(promyelocytic leukemia), HL-60/MX2; Induction of cytotoxicity, intercalation into DNA, apoptosis, cell-cycle arrest at G2/M |
| Hypoestestatin 2 | 126663 | -7.6 | P-388; Induction of cytotoxicity |
| Moschamine | 5969616 | -7.6 | CaCo-2; Induction of cytotoxicity |
| Rohitukine | 13422573 | -7.5 | apoptosis in A549 cancer cell line by upregulation of p53 and caspase-9 and downregulation of the Bcl-2 protein |
| Aplicyanin A | 16718383 | -7.5 | Inactive |
| Netamine G | 21778678 | -7.5 | Inactive against A549 HT29 and MDA-MB-231 |
| Harmaline | 3564 | -7.5 | exhibit antitumor activities by inhibiting the DNA topoisomerases and interfering with DNA synthesis in lung, ovarian, and renal cancer cell lines |
| Agelanin A | 46231989 | -7.5 | Inactive |
| Netamine C | 171120685 | -7.4 | Cytotoxic activity against A549 HT29 and MDA-MB-231cell lines |
| Dibromophakellstatin | 10500579 | -7.3 | OVCAR-3, SF-295, A-498, KM20L2, H-460, SK-MEL-5; cell growth inhibitory activity |
| Isoplysin A | 135465870 | -7.3 | L-1210 (mouse lymphocytic leukemia), KB; Induction of cytotoxicity |
| Netamine A | 171120684 | -7.3 | Inactive against A549 HT29 and MDA-MB-231cell lines |
| Netamine E | 21778680 | -7.3 | Inactive against A549, HT29 and MDA-MB-231 cell lines |
| Arborescidine A | 45272829 | -7.3 | Inactive against KB cell line |
| Harmine | 5280953 | -7.3 | exhibit antitumor activities by inhibiting the DNA topoisomerases and interfering with DNA synthesis in lung, ovarian, and renal cancer cell lines |
| Harmane | 5281404 | -7.3 | exhibit antitumor activities by inhibiting the DNA topoisomerases and interfering with DNA synthesis in lung, ovarian, and renal cancer cell lines |
| Piperine | 638024 | -7.3 | HT-29; antiproliferative effect, increases apoptosis, cell-cycle arrest at G1, decreases cyclins D1 and D3, activating cyclin-dependent kinases 4 and 6 |
| Arctigenin | 64981 | -7.3 | CaCo-2; induction of cytotoxicity |
| Pibocin B | 9975094 | -7.3 | moderate cytotoxic activity against mouse Ehrlich carcinoma cells |
| Variolin D | 10244225 | -7.2 | in vitro cytotoxic activity against the HCT-116 cell line |
| Arborescidine C | 11267652 | -7.2 | Inactive against KB cell line |
| Eudistomin E | 128900 | -7.2 | Cytotoxic activity against human nasopharyngeal carcinoma KB cell lines |
| Homoharringtonine | 285033 | -7.2 | Leukemia; TRAIL-induced necroptosis |
| Hyrtioerectine B | 11665960 | -7.1 | cytotoxic activity against HeLa cells |
| Prodigiosine | 135455579 | -7.1 | human oral squamous carcinoma cells (OECM1 and SAS) cytotoxic activity; suppress cyclin D1 and cause cell cycle arrest in G0/G1, induces cell autophagy |
| Tylophorinidine | 161749 | -7.1 | Human leukemic leukocytes from patients with chronic myelocytic leukemia and acute lymphocytic leukemia; decrease Dihydrofolate reductase and Thymidylate synthase |
| Lamellarin D | 9892144 | -7.1 | Antitumor activity; induce apoptosis through multitarget mechanisms, including inhibition of topoisomerase I, interaction with DNA, and direct mitochondrial effect |
| Clavepictine A | 10383079 | -7 | inhibit the growth of murine leukemia and human solid tumor cell lines |
| Tryptoline | 107838 | -7 | exhibit antitumor activities by inhibiting the DNA topoisomerases and interfering with DNA synthesis in lung, ovarian, and renal cancer cell lines |
| Amphimedoside B | 16091666 | -7 | cytotoxicity against P-388 murine leukemia cell lines |
| Norharmane | 64961 | -7 | cytotoxicity toward both the HeLa cervical-cancer cell line and the BGC-823 stomach-cancer cell line |
| Cribrostatin 4 | 9861633 | -7 | Cytotoxic activity against NCI 60 cell lines |
| Cribrostatin 6 | 9903535 | -7 | inhibit the growth of murine P-388 lymphocytic leukemia |
| Amphimedoside C | 16091664 | -6.9 | cytotoxicity against P-388 murine leukemia cell lines |
| Arnottianamide | 3085181 | -6.9 | Caspase 3 stimulant and MMP9 expression inhibitor |
| Sanguilutine | 356660 | -6.9 | A-375; Induction of necroptosis and autophagy |
| Agelanesin D | 46232061 | -6.9 | Cytotoxic activity murine L1578Y mouse lymphoma cell line |
| Purpuramine J | 9579588 | -6.9 | Mild cytotoxicity against A-2780 (Ovarian tumor) and K-562 (leukemia) cell lines |
| Cribrostatin 3 | 9926342 | -6.9 | Cytotoxic activity against NCI 60 cell lines |
| Pictamine | 6918623 | -6.8 | nil |
| Maedamine B | 10770106 | -6.7 | inactive against c-erbB-2 kinase |
| Makaluvamine A | 4002 | -6.7 | in vivo antitumor activity against the human ovarian carcinoma ovcar-3 implanted in athymic mice |
| Tylophorine | 92114 | -6.7 | cytotoxic against L1210 and P-388 leukemia cell lines. Retards the S-phase progression and arrest the cells at G1 phase in (HONE-1), (HepG2), and (NUGC-3) cell lines |
| Cribrostatin 2 | 9825044 | -6.7 | Cytotoxic activity against p-388 cell lin |
| Meridianin E | 9995236 | -6.7 | potent and selective inhibition of CDK-1 and CDK-5 |
| Dendridine A | 11591550 | -6.6 | moderate cytotoxicity against murine leukemia L-1210 cell lines |
| Mimosamycin | 4198 | -6.6 | P388- induction of cytotoxicity |
| Cribrostatin 1 | 10330480 | -6.5 | Cytotoxic activity against p-388 cell line |
| Clathrodin | 5388709 | -6.5 | Cytotoxicity against CHO-K1 cells |
| Hyrtioerectine C | 11506813 | -6.4 | cytotoxic activity against HeLa cells |
| Secobatzelline A | 135532687 | -6.4 | in vitro cytotoxicity against p-388 and A-549 cell lines |
| Tambjamine A | 135610508 | -6.4 | A549, SW900, H460, DMS53; Induction of necrosis, imbalance in cellular ion homeostasis |
| Tambjamine K | 135934866 | -6.4 | A549, SW900, H460, DMS53; Induction of necrosis, imbalance in cellular ion homeostasis |
| Eudistomin J | 181954 | -6.4 | nil |
| Indicine N-oxide | 280564 | -6.4 | HeLa, MCF7,PC3, SiHa; induces apoptosis |
| Piperlongumine | 637858 | -6.4 | PC-3; Antiproliferative effect |
| Secobatzelline B | 10131311 | -6.3 | in vitro cytotoxicity against p-388 and A-549 cell lines |
| Clavepictine B | 10425214 | -6.3 | inhibit the growth of murine leukemia and human solid tumor cell lines |
| Tambjamine I | 381030 | -6.3 | A549, SW900, H460, DMS53; Induction of necrosis, imbalance in cellular ion homeostasis |
| Agelanesin C | 46232060 | -6.2 | Cytotoxic activity murine L1578Y mouse lymphoma cell line |
| Pseudodistomin B | 6450518 | -6.2 | cytotoxic activity with calmodulin antagonistic activit |
| Pseudodistomin C | 11723443 | -6.1 | Cytotoxic activity |
| Agelanesin B | 46232059 | -6.1 | Potent cytotoxic activity murine L1578Y mouse lymphoma cell line |
| Deformylflustrabromine | 637026 | -6 | showed cytotoxicity against the human colon cancer cell line HCT-116 |
| Matemone | 10084593 | -5.9 | weak cytotoxicity against NSCLC-N6 L16 strain18 (lung cancer) |
| Agelanesin A | 46231991 | -5.8 | Potent cytotoxic activity against murine L1578Y mouse lymphoma cell line |
| Pseudodistomin D | 10708961 | -5.6 | Cytotoxic activity |
| Clavaminol H | 46895880 | -5.4 | Cytotoxic activity |
| Clavaminol A | 16739261 | -5.3 | Cytotoxic activity |
| Clavaminol C | 44424870 | -5.3 | Cytotoxic activity |

**Supplementary Table 2.** Binding free energies (ΔG, kcal/mol) of selected compounds from three drug classes – antidepressants, anti-inflammatories, and statins – interacting with the GPP34 domain of GOLPH3. Reported anticancer properties of each compound are also summarized.

| **S/N** | **CID** | **DRUG NAME** | **Binding Energy (Kcal/mol)** | **PROOF OF ANTICANCER ACTIVITY** |
| --- | --- | --- | --- | --- |
| **ANTIDEPRESSANTS** | | | | |
| 1 | 2160 | [Amitriptyline](https://pubchem.ncbi.nlm.nih.gov/compound/2160) | -8.3 | Demonstrated potent antitumor effects across various cancers including colon, prostate, glioma, squamous cell carcinoma, and multiple myeloma (where it upregulates p53, activates caspase-3, and downregulates anti-apoptotic proteins Bcl-2 and Mcl-1) [4] |
| 2 | 43815 | Paroxetine | -7.8 | activates the Ca2+-dependent mitochondria-mediated intrinsic apoptosis pathway in TNBC by potentially influencing the PI3K/AKT/mTOR pathway as well as by inducing cytoprotective autophagy [5] |
| 3 | 2771 | Citalopram | -7.7 | induces G1/G0 phase cell cycle arrest and promotes apoptosis in human laryngeal carcinoma HEP-2 cells [6] |
| 4 | 68617 | Sertraline | -7.6 | interferes with the TCTP-P53 feedback loop, by increasing the expression of P53 and decreasing the expression of TCTP, promoting P53-dependent apoptosis of cancer cells [7] |
| 5 | 9966051 | Vortioxetine | -7.5 | exhibits anti-glioblastoma activity via the PI3K-Akt signaling pathway [8] |
| 6 | 3696 | Imipramine | -7.1 | inhibits breast cancer growth by targeting estrogen receptor signaling and DNA repair events [9] |
| 7 | 2995 | Desipramine | -7 | Induced apoptosis in Hepatocellular carcinoma cells [10] |
| 8 | 3386 | Fluoxetine | -7 | Suppresses osteosarcoma progression in vivo by inducing apoptosis and inhibiting the AKT/mTOR/NF-κB pathway [11] |
| 9 | 4927 | Promethazine | -7 | inhibits proliferation and promotes apoptosis in colorectal cancer cells by suppressing the PI3K/AKT pathway [12] |
| 10 | 19493 | Parnate | -5.7 | inhibits LSD1 activity in CRC treatment by hindering the covalent binding of LSD1 to FAD [13] |
| **STATINS** | | | | |
| 11 | 5282452 | Pitavastatin | -8.4 | induces caspase‐mediated apoptotic death through oxidative stress and DNA damage in human cervical cancer cell line [14] |
| 12 | 54454 | Simvastatin | -8.1 | exerts anticancer effects in osteosarcoma cell lines via geranylgeranylation and c-Jun activation [15] |
| 13 | 60823 | Atorvastatin | -8 | exhibits anticancer effects by inhibiting YAP/TAZ activity in mesenchymal-like non-small cell lung cancer [16] |
| 14 | 53232 | Lovastatin | -8 | induces apoptosis in cancer cells by downregulating GLO1 and HMGCR expression via suppression of the Ras/PI3K/Akt/NF-κB and Ras/Raf/ERK/NF-κB pathways [17] |
| 15 | 64715 | Mevastatin | -7.9 | in combination with the HDAC inhibitor LBH589, it demonstrates the ability to inhibit the growth of triple-negative breast cancer [18] |
| 16 | 446155 | Fluvastatin | -7.8 | suppresses the proliferation, invasion, and migration and promotes the apoptosis of endometrial cancer cells by upregulating Sirtuin 6 (SIRT6) [19] |
| 17 | 446157 | Rosuvastatin | -7.5 | suppressed tumor progression and potentiated chemosensitivity by downregulating CCNA2 in lung adenocarcinoma [20] |
| 18 | 54687 | Pravastatin | -7.5 | inhibits tumor growth through elevating the levels of apolipoprotein A1 [21] |
| 19 | 446156 | Cerivastatin | -6.7 | Synergistic concentrations of trametinib and cerivastatin induced a massive arrest of proliferation and cell cycle and enhanced apoptosis, particularly in the monosomic, *BAP1*-mutated UPMM3 cell line, thus, reducing ERK and AKT phosphorylation, increasing the inactive, cytoplasmatic form of YAP and significantly impairing the growth of UM cells with monosomy of chromosome 3 in NSG mice [22]. |
| 20 | 10472693 | Bempedoic acid | -5.7 | possess anti-malignant properties through its ability to inhibit ACLY [23] |
| **ANTIINFLAMMATORY DRUGS** | | | | |
| 21 | 5743 | Dexamethasone | -8.6 | inhibits A549 cancer cell growth by inducing oxidative stress and DNA damage [24] |
| 22 | 54676228 | Piroxicam | -8.5 | induced alteration on membrane depolarization and caspase levels in PC3 prostate cancer cells [25] |
| 23 | 3715 | Indomethacin | -8.2 | Anti-proliferative effects in HCT116 human colon cancer cells [26] |
| 24 | 126941 | Methotrexate | -7.7 | proliferation inhibition and apoptosis inducement in OS cells [27] |
| 25 | 3825 | Ketoprofen | -7 | suppresses triple negative breast cancer cell growth by inducing apoptosis and inhibiting autophagy [28] |
| 26 | 1548887 | Sulindac | -7 | exhibits anti-proliferative and anti-invasive effects and enhances the sensitivity to paclitaxel in ovarian cancer [25] |
| 27 | 156391 | Naproxen | -6.9 | Induced cell cycle arrest and apoptosis in human urinary bladder cancer cell lines (UM-UC-5 and UM-UC-14) [29] |
| 28 | 3033 | Diclofenac | -6.7 | inducing cancer cell death by inhibiting microtubule polymerization and autophagy flux [30] |
| 29 | 3672 | Ibuprofen | -6.3 | In vitro anticancer effects on HeLa cell line [31] |
| 30 | 2244 | Aspirin | -5.6 | exerts high anti-cancer activity in PIK3CA-mutant colon cancer cells [32] |


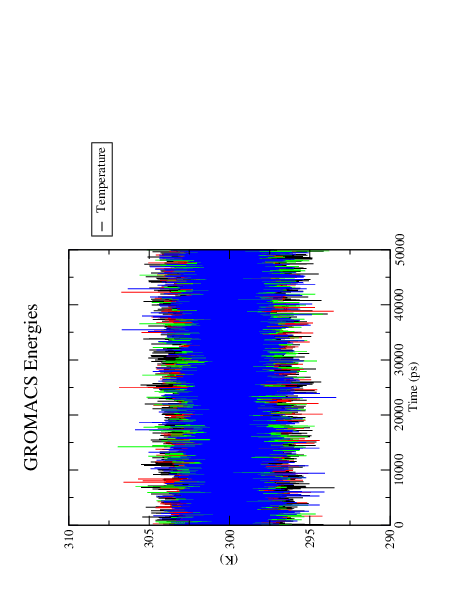

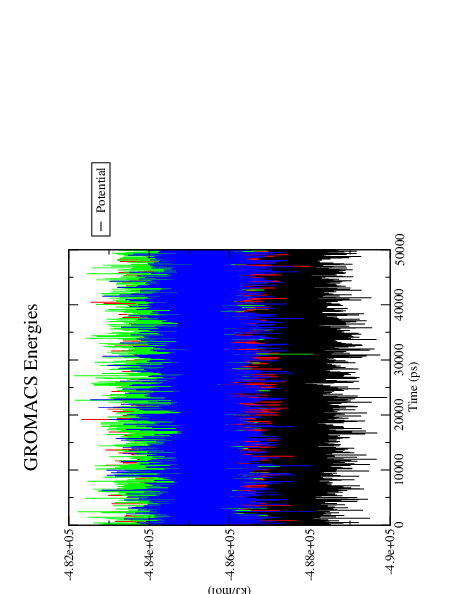


**B**

**A**


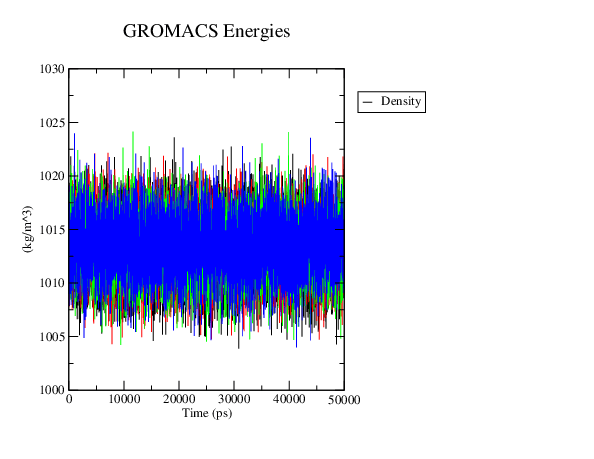


**C**

**Supplementary Fig. 1: Quality check related parameters of the simulated system.** **(A)** Temperature of the GPP34 domain, and bisleuconothine A/notoamide D/pitavastatin hit compounds complex during 50 ns MD simulation **(B).** Potential energy of the GPP34 domain, and bisleuconothine A/notoamide D/pitavastatin hit compounds complex during 50 ns MD simulation. **(C)** Density of the GPP34 domain, and bisleuconothine A/notoamide D/pitavastatin hit compounds complex during 50 ns MD simulation.Unbound protein-black colour; bisleuconithine A bound complex-red; notoamide D bound complex-green; and pitavastatin bound complex is shown in blue.

**References:**

1. Mondal, A., et al., *Alkaloids for cancer prevention and therapy: Current progress and future perspectives.* European journal of pharmacology, 2019. **858**: p. 172472.

2. Gupta, A.P., et al., *Alkaloids: a source of anticancer agents from nature.* Studies in natural products chemistry, 2015. **46**: p. 341-445.

3. Deyá, A.D., *Anti-cancer properties of benzophenanthridine alkaloids from Zanthoxylum genus-in silico evidence.* Revista Latinoamericana de Química, 2022. **49**(1): p. 26-44.

4. Motafeghi, F., et al., *Anticancer effect of paroxetine and amitriptyline on HT29 and A549 cell lines.* Toxicology in Vitro, 2023. **87**: p. 105532.

5. Huang, Q., et al., *Inhibition of TNBC Cell Growth by Paroxetine: Induction of Apoptosis and Blockage of Autophagy Flux.* Cancers, 2024. **16**(5): p. 885.

6. Salama, M., et al., *Citalopram, an antipsychotic agent, induces G1/G0 phase cell cycle arrest and promotes apoptosis in human laryngeal carcinoma HEP-2 cells.* Medical Oncology, 2024. **41**(5): p. 105.

7. Duarte, D. and N. Vale, *Antidepressant Drug Sertraline against Human Cancer Cells.* Biomolecules, 2022. **12**(10): p. 1513.

8. Zhang, H.Q., et al., *Vortioxetine exhibits anti-glioblastoma activity via the PI3K-Akt signaling pathway.* Iran J Basic Med Sci, 2025. **28**(4): p. 401-408.

9. Timilsina, S., et al., *The antidepressant imipramine inhibits breast cancer growth by targeting estrogen receptor signaling and DNA repair events.* Cancer Letters, 2022. **540**: p. 215717.

10. HUANG, Y.-H. and C.-T. YEH, *Anticancer Effects of Antidepressants in Hepatocellular Carcinoma Cells.* Anticancer Research, 2023. **43**(3): p. 1201-1206.

11. CHEN, Y.-H., et al., *Fluoxetine Suppresses Osteosarcoma Progression <em>In Vivo</em> by Inducing Apoptosis and Inhibiting the AKT/mTOR/NF-κB Signaling Pathway.* Anticancer Research, 2025. **45**(4): p. 1465-1480.

12. Tan, X., et al., *Promethazine inhibits proliferation and promotes apoptosis in colorectal cancer cells by suppressing the PI3K/AKT pathway.* Biomedicine & Pharmacotherapy, 2021. **143**: p. 112174.

13. Chen, J., et al., *Overview and new insights of lysine-specific histone demethylase 1 in colorectal cancer: promoting epithelial-mesenchymal transition and stemness features of cancer stem cells.* Oncologie, 2024. **26**(3): p. 369-377.

14. Hacıseyitoğlu, A.Ö., et al., *Pitavastatin induces caspase‐mediated apoptotic death through oxidative stress and DNA damage in combined with cisplatin in human cervical cancer cell line.* Journal of Applied Toxicology, 2024. **44**(4): p. 623-640.

15. Kany, S., et al., *Simvastatin exerts anticancer effects in osteosarcoma cell lines via geranylgeranylation and c-Jun activation.* Int J Oncol, 2018. **52**(4): p. 1285-1294.

16. Ishikawa, T., et al., *Atorvastatin exhibits anticancer effects by inhibiting YAP/TAZ activity in mesenchymal-like non-small cell lung cancer.* Scientific Reports, 2025. **15**(1): p. 30167.

17. Monu, M., et al., *An overview on the therapeutic potential and anticancer mechanism of Monacolin K/Lovastatin.* Pharmacological Research-Modern Chinese Medicine, 2022. **5**: p. 100187.

18. Lin, Z., et al., *Mevastatin blockade of autolysosome maturation stimulates LBH589-induced cell death in triple-negative breast cancer cells.* Oncotarget, 2017. **8**(11): p. 17833-17848.

19. Cai, Y. and F. Zhao, *Fluvastatin suppresses the proliferation, invasion, and migration and promotes the apoptosis of endometrial cancer cells by upregulating Sirtuin 6 (SIRT6).* Bioengineered, 2021. **12**(2): p. 12509-12520.

20. Tan, X.-D., C.-F. Luo, and S.-Y. Liang, *Antihyperlipidemic drug rosuvastatin suppressed tumor progression and potentiated chemosensitivity by downregulating CCNA2 in lung adenocarcinoma.* Journal of Chemotherapy, 2024. **36**(8): p. 662-674.

21. Yeh, C., et al., *Pravastatin inhibits tumor growth through elevating the levels of apolipoprotein A1.* Advances in Digestive Medicine, 2016. **3**(1): p. 3-10.

22. Amaro, A.A., et al., *Cerivastatin Synergizes with Trametinib and Enhances Its Efficacy in the Therapy of Uveal Melanoma.* Cancers, 2023. **15**(3): p. 886.

23. Kounatidis, D., et al., *The pleiotropic effects of lipid-modifying interventions: exploring traditional and emerging hypolipidemic therapies.* Metabolites, 2024. **14**(7): p. 388.

24. Motafeghi, F., et al., *Dexamethasone as an anti-cancer or hepatotoxic.* Toxicology Mechanisms and Methods, 2023. **33**(2): p. 161-171.

25. Chen, S., et al., *Sulindac exhibits anti-proliferative and anti-invasive effects and enhances the sensitivity to paclitaxel in ovarian cancer.* Frontiers in Pharmacology, 2025. **16**: p. 1520771.

26. Cihan-üstündağ, G., et al., *Anti-proliferative effects of indomethacin, acemetacin and their tromethamine salts in HCT116 human colon cancer cells.* İstanbul Journal of Pharmacy, 2021. **51**(2): p. 161-166.

27. Mohammadi, E., et al., *Quercetin and methotrexate in combination have anticancer activity in osteosarcoma cells and repress oncogenic microRNA-223.* Drug Research, 2022. **72**(04): p. 226-233.

28. Patra, I., et al., *Ketoprofen suppresses triple negative breast cancer cell growth by inducing apoptosis and inhibiting autophagy.* Molecular Biology Reports, 2023. **50**(1): p. 85-95.

29. Sousa, S.M., et al., *Repurposing some of the well-known non-steroid anti-inflammatory drugs (NSAIDs) for cancer treatment.* Current Topics in Medicinal Chemistry, 2023. **23**(13): p. 1171-1195.

30. Choi, S., et al., *Diclofenac: A nonsteroidal anti-inflammatory drug inducing cancer cell death by inhibiting microtubule polymerization and autophagy flux.* Antioxidants, 2022. **11**(5): p. 1009.

31. Ghadiri, E., et al., *In vitro anticancer effects of ibuprofen on HeLa cell line.* Journal of Biological Studies, 2021. **4**(3): p. 93-105.

32. Gu, M., et al., *Aspirin exerts high anti-cancer activity in PIK3CA-mutant colon cancer cells.* Oncotarget, 2017. **8**(50): p. 87379.
